# Supplementary material for: Evolution and Association Analysis of Ghd7 in Rice
Source: PubMed Central journal article supplement (PMC3364234; doi:10.1371/journal.pone.0034021), 2012-05-30
Supplement: pone.0034021.s005.pdf [file pone.0034021.s005.pdf]

Table S2: Correlation coefficients between the expression levels of *Ghd7/Ehd1* and the three related phenotypes in the whole population in long day condition 2007

|             | <i>Ghd7</i> | <i>Ehd1</i> | PH      | HD    |
|-------------|-------------|-------------|---------|-------|
| <i>Ehd1</i> | -0.185      |             |         |       |
| PH          | 0.339       | -0.43**     |         |       |
| HD          | 0.061       | -0.49**     | 0.451** |       |
| SPP         | -0.225      | 0.077       | -0.132  | -0.12 |

\*, \*\* indicate  $P < 0.01$  and  $P < 0.001$  respectively.
