# Supplementary material for: Evolution and Association Analysis of Ghd7 in Rice
Source: PubMed Central journal article supplement (PMC3364234; doi:10.1371/journal.pone.0034021), 2012-05-30
Supplement: pone.0034021.s006.pdf [file pone.0034021.s006.pdf]

Table S3: Correlation coefficients between the expression levels of *Ghd7/Ehd1* and the three related phenotypes within haplotypes H2 and H3 in long day 2007

|             | <i>Ghd7</i> | <i>Ehd1</i> | PH     | HD     |
|-------------|-------------|-------------|--------|--------|
| <i>Ehd1</i> | -0.503*     |             |        |        |
| PH          | 0.635**     | -0.559*     |        |        |
| HD          | 0.16        | -0.516*     | 0.502* |        |
| SPP         | -0.358      | 0.303       | -0.296 | -0.264 |

\*, \*\* indicate  $P < 0.01$  and  $P < 0.001$  respectively.
